# Supplementary material for: Social deprivation does not impact on acute pancreatitis severity and mortality: a single-centre study
Source: PubMed Central journal article supplement — BMJ Open Gastroenterol. 2023 Feb 6;10(1):e001035. doi: 10.1136/bmjgast-2022-001035 (PMC9906294; doi:10.1136/bmjgast-2022-001035), 2023-02-06
Supplement: bmjgast-2022-001035supp001.pdf [file bmjgast-2022-001035supp001.pdf]

**Supplementary figure 1 – Kaplan Meier Plot of Survival by IMD 1-3 compared to IMD 4-10**

Log rank: 0.138

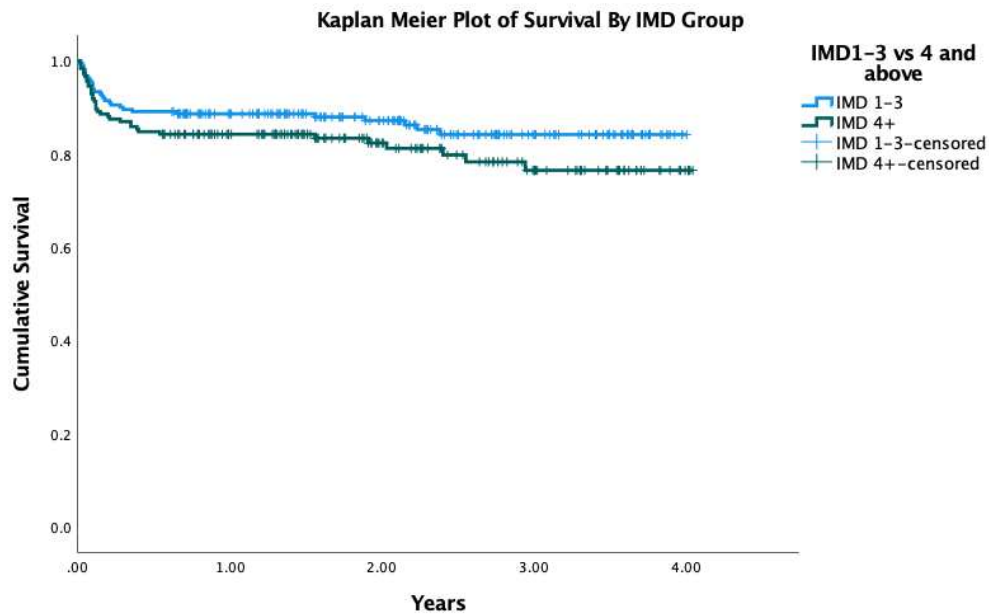

## No. At Risk Table

|                                 | Year |     |     |    |   |
|---------------------------------|------|-----|-----|----|---|
|                                 | 0    | 1   | 2   | 3  | 4 |
| IMD 1-3<br>(n = 221)            | 211  | 162 | 108 | 48 | 1 |
| IMD 4 and<br>above<br>(n = 183) | 183  | 129 | 73  | 40 | 5 |

IMD: indices of multiple deprivation
