# Supplementary material for: Social deprivation does not impact on acute pancreatitis severity and mortality: a single-centre study
Source: PubMed Central journal article supplement — BMJ Open Gastroenterol. 2023 Feb 6;10(1):e001035. doi: 10.1136/bmjgast-2022-001035 (PMC9906294; doi:10.1136/bmjgast-2022-001035), 2023-02-06
Supplement: bmjgast-2022-001035supp002.pdf [file bmjgast-2022-001035supp002.pdf]

**Supplementary table 1. Table of Clinical outcomes post pancreatitis by Quintile**

|                                                      | Q1          | Q2         | Q3         | Q4         | Q5         | P-value |
|------------------------------------------------------|-------------|------------|------------|------------|------------|---------|
| Superior mesenteric vein thrombus (yes)              | 12 (7.69%)  | 7 (7.45%)  | 4 (6.67%)  | 5 (10.4%)  | 4 (10.5%)  | 0.790   |
| Revised Atlanta classification of acute pancreatitis |             |            |            |            |            |         |
| Severe                                               | 41 (26.3%)  | 29 (30.9%) | 27 (45%)   | 11 (22.9%) | 13 (34.2%) | 0.939   |
| Mod                                                  | 95 (60.9%)  | 48 (51.1%) | 19 (31.7%) | 33 (68.8%) | 18 (47.4%) |         |
| Mild                                                 | 20 (12.8%)  | 17 (18.1%) | 14 (23.3%) | 4 (8.33%)  | 7 (18.4%)  |         |
| Organ failure                                        |             |            |            |            |            |         |
| None                                                 | 109 (69.9%) | 63 (67.0%) | 30 (50%)   | 35 (72.9%) | 24 (63.2%) | 0.351   |
| Persistent                                           | 36 (23.1%)  | 26 (27.7%) | 29 (48.3%) | 12 (25%)   | 13 (34.2%) |         |
| Transient                                            | 11 (7.05%)  | 5 (5.32%)  | 1 (1.67%)  | 1 (2.08%)  | 1 (2.63%)  |         |
| Splenic vein thrombus (SVT)                          | 31 (19.9%)  | 17 (18.1%) | 5 (8.33%)  | 10 (20.8%) | 10 (26.3%) | 0.789   |
| Portal vein thrombus (PVT)                           | 23 (14.7%)  | 13 (13.8%) | 9 (15%)    | 8 (16.7%)  | 9 (23.7%)  | 0.687   |
| Combined PVT and SVT                                 | 12 (7.69%)  | 5 (5.32%)  | 1 (1.67%)  | 4 (8.33%)  | 5 (13.2%)  | 0.232   |
| Pancreas necrosis                                    | 98 (62.8%)  | 53 (56.4%) | 35 (58.3%) | 35 (72.9%) | 24 (63.2%) | 0.397   |
| Pseudoaneurysm                                       | 3 (1.92%)   | 0 (0%)     | 2 (3.33%)  | 3 (6.25%)  | 0 (0%)     | 0.110   |
| Total intensive care unit visits                     |             |            |            |            |            |         |
| 0                                                    | 118 (75.6%) | 67 (71.3%) | 34 (56.7%) | 36 (75%)   | 25 (65.8%) | 0.208   |
| 1                                                    | 29 (18.6%)  | 22 (23.4%) | 22 (36.7%) | 10 (20.8%) | 12 (31.6%) |         |
| 2                                                    | 3 (1.92%)   | 2 (2.13%)  | 1 (1.67%)  | 2 (4.17%)  | 1 (2.63%)  |         |
| 3                                                    | 3 (1.92%)   | 2 (2.13%)  | 2 (3.33%)  | 0 (0%)     | 0 (0%)     |         |
| Number of organs supported                           |             |            |            |            |            |         |
| 0                                                    | 118 (75.6%) | 71 (75.5%) | 35 (58.3%) | 38 (79.2%) | 26 (68.4%) | 0.114   |
| 1                                                    | 19 (12.2%)  | 13 (13.8%) | 15 (25%)   | 3 (6.25%)  | 9 (23.7%)  |         |
| 2                                                    | 10 (6.41%)  | 9 (9.57%)  | 8 (13.3%)  | 7 (14.6%)  | 3 (7.89%)  |         |
| Pancreatic enzyme replacement therapy                |             |            |            |            |            |         |
| Yes                                                  | 98 (62.8%)  | 58 (61.7%) | 33 (55%)   | 29 (60.4%) | 23 (60.5%) | 0.717   |
| Intensive care units stay                            |             |            |            |            |            |         |

|              |           |            |           |           |           |               |
|--------------|-----------|------------|-----------|-----------|-----------|---------------|
| Mean (S.D)   | 4 (14)    | 6 (16)     | 14 (32)   | 9 (27)    | 5(14)     | <b>0.035*</b> |
| Median (IQR) | 0(0-0)    | 0(0-8)     | 0(0-13)   | 0(0-0)    | 0(0-3)    |               |
| Overall Stay |           |            |           |           |           |               |
| Mean (S.D)   | 31(28)    | 32(37)     | 42(45)    | 36(50)    | 28(23)    | 0.271         |
| Median (IQR) | 20(13-39) | 20 (13-37) | 26(14-40) | 17(11-33) | 22(13-36) |               |

\*Statistically significant at <0.05 level
