# Supplementary material for: Social deprivation does not impact on acute pancreatitis severity and mortality: a single-centre study
Source: PubMed Central journal article supplement — BMJ Open Gastroenterol. 2023 Feb 6;10(1):e001035. doi: 10.1136/bmjgast-2022-001035 (PMC9906294; doi:10.1136/bmjgast-2022-001035), 2023-02-06
Supplement: bmjgast-2022-001035supp003.pdf [file bmjgast-2022-001035supp003.pdf]

**Supplementary table 2 - COX regression analysis of factors predicting survival**

|                                              |               |       | 95.0% CI |        |
|----------------------------------------------|---------------|-------|----------|--------|
|                                              | P-value       | HR    | Lower    | Upper  |
| IMD Q5                                       | 0.964         | 0.932 | 0.224    | 3.850  |
| IMD Q5(1)                                    | 0.904         | 0.917 | 0.224    | 3.760  |
| IMD Q5(2)                                    | 0.590         | 0.651 | 0.137    | 3.105  |
| IMD Q5(3)                                    | 0.604         | 0.641 | 0.119    | 3.441  |
| IMD Q5(4)                                    | 0.959         | 0.956 | 0.173    | 5.289  |
| Age                                          | <b>0.003*</b> | 1.064 | 1.021    | 1.108  |
| Gender                                       | 0.087         | 0.368 | 0.117    | 1.158  |
| Past acute pancreatitis                      | 0.135         | 2.589 | 0.743    | 9.027  |
| Type 2 Diabetes                              | 0.714         | 1.258 | 0.368    | 4.299  |
| Past alcohol dependence                      | 0.420         | 0.622 | 0.196    | 1.975  |
| Ischaemic Heart Disease (IHD)                | 0.118         | 6.784 | 0.616    | 74.688 |
| Hypertension (HTN)                           | 0.855         | 1.100 | 0.393    | 3.078  |
| Chronic Kidney Disease (CKD)                 | 0.216         | 0.371 | 0.077    | 1.786  |
| Chronic Obstructive Pulmonary Disease (COPD) | 0.333         | 3.091 | 0.315    | 30.344 |
| Smoker (active)                              | 0.870         | 1.097 | 0.361    | 3.333  |
| Prothrombin time                             | <b>0.050*</b> | 0.868 | 0.753    | 1.000  |
| Interstitial Oedematous Pancreatitis (IEP)   | 0.519         | 0.439 | 0.036    | 5.363  |
| Necrotising Pancreatitis (NP)                | 0.509         | 0.445 | 0.040    | 4.908  |
| Combined splenic and portal vein thrombosis  | 0.771         | 1.387 | 0.153    | 12.542 |
| Pancreatic necrosis                          | 0.367         | 1.958 | 0.454    | 8.436  |
| Dialysis                                     | 0.710         | 0.803 | 0.252    | 2.557  |
| Ventilatory support                          | <b>0.036*</b> | 0.319 | 0.110    | 0.927  |
| Endocrine dysfunction                        | 0.825         | 0.847 | 0.195    | 3.679  |

\*Statistically significant at <0.05 level

IMD: indices of multiple deprivation
