# Supplementary material for: Social deprivation does not impact on acute pancreatitis severity and mortality: a single-centre study
Source: PubMed Central journal article supplement — BMJ Open Gastroenterol. 2023 Feb 6;10(1):e001035. doi: 10.1136/bmjgast-2022-001035 (PMC9906294; doi:10.1136/bmjgast-2022-001035), 2023-02-06
Supplement: bmjgast-2022-001035supp004.pdf [file bmjgast-2022-001035supp004.pdf]

**Supplementary table 3 - Multi-variable Binary Logistic regression analysis of factors predicting survival**

|                                              |                   |       | 95% CI |        |
|----------------------------------------------|-------------------|-------|--------|--------|
|                                              | P-value           | OR    | Lower  | Upper  |
| Age                                          | <b>0.001*</b>     | 1.054 | 1.023  | 1.087  |
| Gender                                       | 0.408             | 0.710 | 0.315  | 1.598  |
| Ischaemic Heart Disease (IHD)                | 0.089             | 3.765 | 0.819  | 17.318 |
| Chronic Obstructive Pulmonary Disease (COPD) | 0.366             | 2.547 | 0.335  | 19.347 |
| Alcohol                                      | 0.844             | 1.082 | 0.493  | 2.375  |
| Alkaline phosphatase (ALP)                   | 0.103             | 1.002 | 1.000  | 1.004  |
| Platelet count                               | 0.276             | 0.998 | 0.995  | 1.001  |
| Prothrombin time                             | <b>0.027*</b>     | 0.888 | 0.799  | 0.986  |
| Ventilation                                  | <b>&lt;0.001*</b> | 0.198 | 0.090  | 0.434  |

\*Statistically significant at <0.05 level
